# Supplementary material
Source: MDPI journal article supplement (https://www.mdpi.com/1999-4907/6/12/4385)
Supplement: s1 [file s1]

**Supplementary Materials: Habitat Effect on Allometry of a Xeric Shrub (*****Artemisia ordosica* Krasch) in the Mu Us Desert of Northern China**

Weiwei She 1, Yuqing Zhang 1,2,*, Shugao Qin 1,2, Bin Wu 1,2, Zhen Liu 1, Jun Liu 1 and Wenjin Zhang 1

**Table S1.** Vegetation and soil characteristics of *A. ordosica* communities in three different habitats.

| **Habitat** | **Vegetation Coverage (%)** | **Bulk Density (g·cm−3)** | **pH** | **SOC (g·kg−1)** | **TN (g·kg−1)** | **TP (g·kg−1)** |
| --- | --- | --- | --- | --- | --- | --- |
| FC | 60 | 1.43 ± 0.05 a | 7.55 ± 0.04 a | 2.74 ± 0.17 a | 0.20 ± 0.03 a | 0.26 ± 0.01 a |
| FD | 30 | 1.38 ± 0.02 a | 7.48 ± 0.06 a | 1.33 ± 0.12 b | 0.07 ± 0.00 b | 0.18 ± 0.01 b |
| SF | 10 | 1.50 ± 0.05 a | 7.57 ± 0.02 a | 0.82 ± 0.07 c | 0.05 ± 0.00 b | 0.16 ± 0.01 b |

Habitats with different letters are signiﬁcantly different, *p* = 0.05.

**Table S2.** Summary of model variables for sample plants across habitats.

| **Habitat/*CA*-Class** | ***n*** | ***CA* (m2)** | ***V* (m3)** | **Biomass (g)** | **ANPP (g)** |
| --- | --- | --- | --- | --- | --- |
| FC | 31 | 0.67 ± 0.13 (0.05–3.58) | 0.42 ± 0.10 (0.02–2.20) | 469.15 ± 137.18 (6.69–3136.24) | 82.99 ± 19.93 (3.26–450.36) |
| FD | 31 | 0.80 ± 0.10 (0.06–2.40) | 0.53 ± 0.09 (0.01–1.92) | 318.37 ± 57.21 (6.30–1088.00) | 65.97 ± 10.32 (2.42–196.91) |
| SF | 31 | 1.06 ± 0.10 (0.24–2.67) | 0.75 ± 0.10 (0.11–2.40) | 348.60 ± 71.92 (21.53–2126.81) | 108.89 ± 23.44 (10.21–650.08) |
| All | 93 | 0.84 ± 0.07 (0.05–3.58) | 0.57 ± 0.06 (0.01–2.40) | 378.71 ± 54.86 (6.30–3136.24) | 85.95 ± 10.86 (2.42–650.08) |
| 0–0.5 | 30 | 0.27 ± 0.02 (0.05–0.49) | 0.12 ± 0.01 (0.01–0.30) | 61.84 ± 12.33 (6.30–335.19) | 18.44 ± 2.61 (2.42–63.51) |
| 0.5–1.0 | 33 | 0.69 ± 0.02 (0.50–0.99) | 0.41 ± 0.02 (0.20–0.64) | 199.14 ± 18.96 (51.25–513.31) | 51.23 ± 4.02 (17.48–103.90) |
| >1.0 | 30 | 1.59 ± 0.10 (1.04–3.58) | 1.19 ± 0.09 (0.56–2.40) | 893.09 ± 123.29 (296.56–3136.24) | 191.65 ± 23.34 (43.49–650.08) |

Values are mean ± standard error (min–max).

**Table S3.** Allometric models of aboveground biomass and ANPP with *CA* (m2) as independent variable.

| **Dependent Variable** | **Habitat** | **Model** | **Parameter Estimates** | | | **Observed Mean (g)** | **RMSE (g)** | ***R*2** | ***%Bias*** | ***%Ae*** |
| --- | --- | --- | --- | --- | --- | --- | --- | --- | --- | --- |
| **β0** | **β1** | **β2** |
| Aboveground biomass | FC (*n* = 31) | Linear | −150.919 N | 928.999 |  | 469.15 | 319.83 | 0.82 | 0.00 | 39.66 |
| **Quadratic** | **−355.936** | **1516.203** | **−190.515** | 469.15 | 279.01 | 0.86 | 0.00 | 40.89 |
| Power | 788.169 | 1.069 |  | 469.15 | 335.96 | 0.80 | −12.61 | 46.59 |
| FD (*n* = 31) | **Linear** | **−122.591** | **548.784** |  | 318.37 | 102.46 | 0.89 | 0.00 | 24.98 |
| Quadratic | −149.506 | 617.888 | −30.539 N | 318.37 | 101.74 | 0.89 | 0.00 | 25.11 |
| Power | 407.836 | 1.260 |  | 318.37 | 108.44 | 0.88 | −3.95 | 26.34 |
| SF (*n* = 31) | Linear | −315.089 | 627.451 |  | 348.60 | 184.68 | 0.78 | 0.00 | 35.56 |
| Quadratic | 146.240 N | −306.468 | 369.132 | 348.60 | 105.85 | 0.93 | 0.00 | 22.81 |
| **Power** | **198.989** | **2.345** |  | 348.60 | 105.90 | 0.93 | 5.78 | 21.78 |
| General (*n* = 93) | Linear | −198.405 | 684.664 |  | 378.71 | 295.59 | 0.68 | 0.00 | 46.62 |
| Quadratic | −98.407 N | 445.683 | 90.996 | 378.71 | 289.32 | 0.70 | 0.00 | 42.53 |
| **Power** | **426.079** | **1.447** |  | 378.71 | 288.02 | 0.70 | −2.72 | 41.41 |
| ANPP | FC (*n* = 31) | Linear | 0.215 N | 124.008 |  | 82.99 | 60.63 | 0.69 | 0.00 | 37.14 |
| **Quadratic** | **−52.637** | **275.384** | **−49.113** | 82.99 | 45.29 | 0.83 | 0.00 | 36.56 |
| Power | 135.292 | 0.869 |  | 82.99 | 59.13 | 0.71 | −9.11 | 42.08 |
| FD (*n* = 31) | Linear | −7.731 N | 91.724 |  | 65.97 | 27.34 | 0.77 | 0.00 | 29.22 |
| Quadratic | −16.245 N | 113.584 | −9.661 N | 65.97 | 27.07 | 0.77 | 0.00 | 30.09 |
| **Power** | **83.478** | **1.063** |  | 65.97 | 27.55 | 0.76 | −1.70 | 29.76 |
| SF (*n* = 31) | Linear | −90.657 | 188.655 |  | 108.89 | 74.46 | 0.66 | 0.00 | 49.16 |
| Quadratic | 41.396 N | −78.672 N | 105.661 | 108.89 | 60.56 | 0.78 | 0.00 | 37.53 |
| **Power** | **64.636** | **2.255** |  | 108.89 | 60.78 | 0.78 | 5.85 | 36.90 |
| General (*n* = 93) | **Linear** | **−23.430** | **129.765** |  | 85.95 | 63.54 | 0.63 | 0.00 | 44.68 |
| Quadratic | −29.327 N | 143.856 | −5.365 N | 85.95 | 63.44 | 0.63 | 0.00 | 45.47 |
| Power | 102.941 | 1.180 |  | 85.95 | 63.92 | 0.62 | −3.24 | 43.62 |

N Parameter estimate not significant (*p* > 0.05), selected models in bold; none of *%bias* values significantly different from zero (*p* > 0.05); all *%ae* significantly different from zero (*p* < 0.05).

**Table S4.** Allometric models of aboveground biomass and ANPP with *V* (m3) as independent variable.

| **Dependent Variable** | **Habitat** | **Model** | **Parameter Estimates** | | | **Observed Mean (g)** | **RMSE (g)** | **R2** | ***%Bias*** | ***%Ae*** |
| --- | --- | --- | --- | --- | --- | --- | --- | --- | --- | --- |
| **β0** | **β1** | **β2** |
| Aboveground biomass | FC (*n* = 31) | Linear | −99.635 N | 1341.786 |  | 469.15 | 237.69 | 0.90 | 0.00 | 29.43 |
| Quadratic | −35.940 N | 985.566 | 189.025 N | 469.15 | 230.12 | 0.91 | 0.00 | 24.39 |
| **Power** | **1154.236** | **1.218** |  | 469.15 | 231.04 | 0.91 | −0.58 | 24.02 |
| FD (*n* = 31) | Linear | −10.973 N | 622.647 |  | 318.37 | 109.96 | 0.88 | 0.00 | 24.61 |
| Quadratic | −79.882 N | 899.309 | −154.269 | 318.37 | 101.35 | 0.90 | 0.00 | 24.83 |
| **Power** | **613.879** | **0.968** |  | 318.37 | 109.87 | 0.88 | −2.98 | 25.53 |
| SF (*n* = 31) | Linear | −123.083 N | 632.359 |  | 348.60 | 194.61 | 0.76 | 0.00 | 37.77 |
| Quadratic | 97.713 N | 2.082 N | 293.417 | 348.60 | 163.11 | 0.83 | 0.00 | 33.15 |
| **Power** | **417.177** | **1.612** |  | 348.60 | 173.90 | 0.81 | 7.06 | 33.40 |
| General (*n* = 93) | Linear | −77.705 N | 806.026 |  | 378.71 | 304.08 | 0.67 | 0.00 | 45.43 |
| Quadratic | 28.758 N | 380.385 | 222.585 | 378.71 | 294.32 | 0.69 | 0.00 | 41.90 |
| **Power** | **666.457** | **1.310** |  | 378.71 | 297.38 | 0.68 | 3.13 | 41.48 |
| ANPP | FC (*n* = 31) | Linear | 5.567 N | 182.632 |  | 82.99 | 50.00 | 0.79 | 0.00 | 28.75 |
| Quadratic | 0.839 N | 209.075 | −14.032 N | 82.99 | 49.81 | 0.79 | 0.00 | 28.88 |
| **Power** | **193.433** | **0.906** |  | 82.99 | 49.64 | 0.79 | −1.71 | 29.24 |
| FD (*n* = 31) | Linear | 11.621 N | 102.754 |  | 65.97 | 29.20 | 0.73 | 0.00 | 31.06 |
| Quadratic | −1.063 N | 153.677 | −28.395 N | 65.97 | 28.12 | 0.75 | 0.00 | 29.51 |
| **Power** | **117.650** | **0.802** |  | 65.97 | 28.47 | 0.75 | −1.05 | 29.85 |
| SF (*n* = 31) | Linear | −29.496 N | 185.532 |  | 108.89 | 79.95 | 0.61 | 0.00 | 50.42 |
| Quadratic | 26.837 N | 24.726 N | 74.861 N | 108.89 | 75.22 | 0.66 | 0.00 | 48.25 |
| **Power** | **136.426** | **1.448** |  | 108.89 | 77.35 | 0.64 | 5.03 | 47.76 |
| General (*n* = 93) | Linear | −3.201 N | 157.443 |  | 85.95 | 61.71 | 0.65 | 0.00 | 42.62 |
| Quadratic | 14.263 N | 87.619 | 36.514N | 85.95 | 60.42 | 0.66 | 0.00 | 41.98 |
| **Power** | **149.919** | **1.107** |  | 85.95 | 61.42 | 0.65 | 2.78 | 42.02 |

N Parameter estimate not significant (*p* > 0.05), selected models in bold; none of *%bias* values significantly different from zero (*p* > 0.05); all *%ae* significantly different from zero (*p* < 0.05).

**Table S5.** Best fitted allometric models for dead material and woody parts with *CA* (m2, upper part) and *V* (m3, lower part) as independent variables.

| **Dependent Variable** | **Habitat** | **Model** | **Parameter Estimates** | | | **Observe Mean (g)** | **RMSE (g)** | ***R*2** | ***%bias*** | ***%ae*** |
| --- | --- | --- | --- | --- | --- | --- | --- | --- | --- | --- |
| **β0** | **β1** | **β2** |
| Dead material (*CA*) | FC (*n* = 18) | Power | 320.827 | 1.249 |  | 276.29 | 238.77 | 0.74 | −13.77 | 51.70 |
| FD (*n* = 24) | Quadratic | −138.621 | 357.596 | −95.743 | 91.70 | 51.15 | 0.61 | 0.00 | 46.20 |
| SF (*n* = 27) | Power | 42.213 | 1.178 |  | 49.09 | 41.13 | 0.35 | −2.13 | 63.48 |
| General (*n* = 69) | Power | 81.214 | 2.064 |  | 123.18 | 202.23 | 0.42 | 2.28 | 75.43 |
| Woody parts (*CA*) | FC (*n* = 31) | Quadratic | −163.810 | 797.346 | −144.559 | 226.56 | 102.18 | 0.89 | 0.00 | 35.93 |
| FD (*n* = 30) | Power | 229.111 | 1.405 |  | 187.45 | 69.66 | 0.88 | −2.84 | 25.21 |
| SF (*n* = 30) | Quadratic | 139.505 | −312.539 | 273.194 | 203.52 | 73.07 | 0.92 | 0.00 | 27.22 |
| General (*n* = 91) | Power | 241.803 | 1.255 |  | 206.07 | 143.91 | 0.68 | −3.62 | 43.53 |
| Dead material (*V*) | FC (*n* = 18) | Power | 412.555 | 1.814 |  | 276.29 | 95.27 | 0.96 | 2.00 | 18.16 |
| FD (*n* = 24) | Power | 138.719 | 0.790 |  | 91.70 | 57.20 | 0.51 | −3.48 | 49.20 |
| SF (*n* = 27) | Power | 60.923 | 0.944 |  | 49.09 | 39.39 | 0.40 | −1.16 | 59.72 |
| General (*n* = 69) | Power | 161.270 | 1.716 |  | 123.18 | 217.44 | 0.33 | 4.35 | 84.64 |
| Woody parts (*V*) | FC (*n* = 31) | Power | 543.157 | 0.864 |  | 226.56 | 126.35 | 0.82 | −10.97 | 37.16 |
| FD (*n* = 30) | Power | 359.811 | 1.066 |  | 187.45 | 77.09 | 0.85 | −1.81 | 29.64 |
| SF (*n* = 30) | Power | 201.843 | 1.980 |  | 203.52 | 117.77 | 0.78 | 13.73 | 40.09 |
| General (*n* = 91) | Power | 360.928 | 1.152 |  | 206.07 | 139.00 | 0.70 | 1.52 | 40.43 |

All parameter estimates are significant (*p* < 0.05); none of *%bias* values significantly different from zero (*p* > 0.05); all *%ae* significantly different from zero (*p* < 0.05).


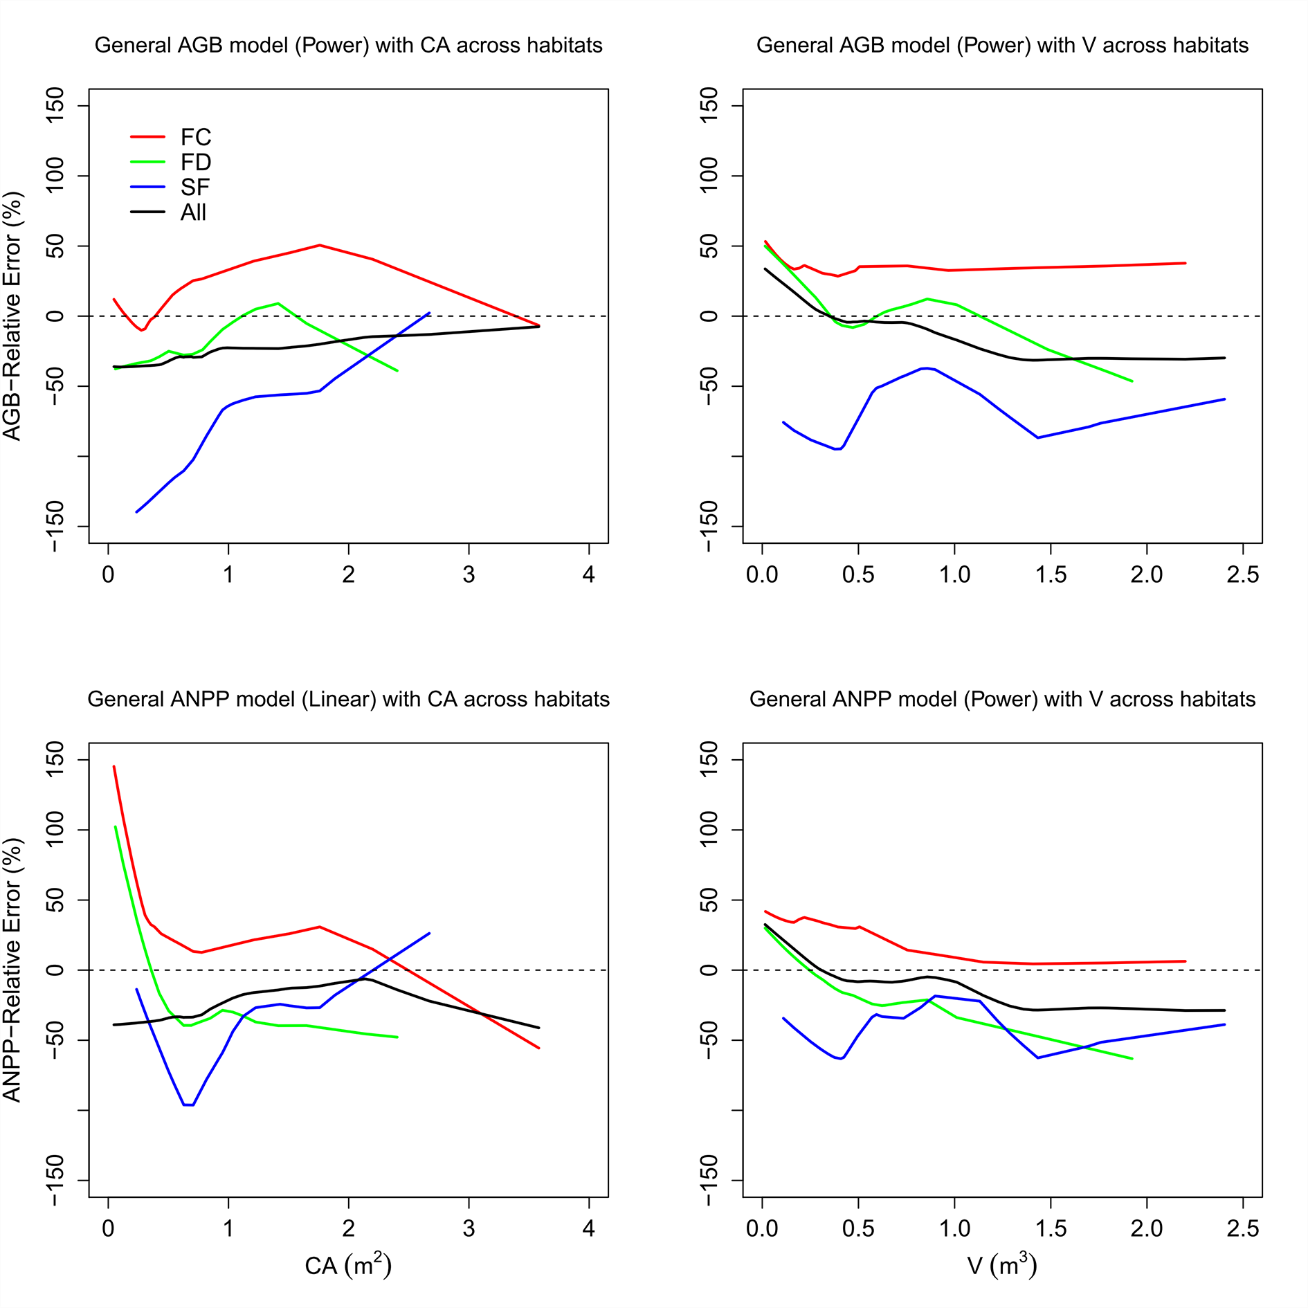


**Figure S1.** The relative error (% difference between observed and predicted biomass) with increasing *CA* or *V* for evaluating general models across habitats. Solid lines are smoothed errors using a lowess (locally weighted scatterplot smoothing) method.


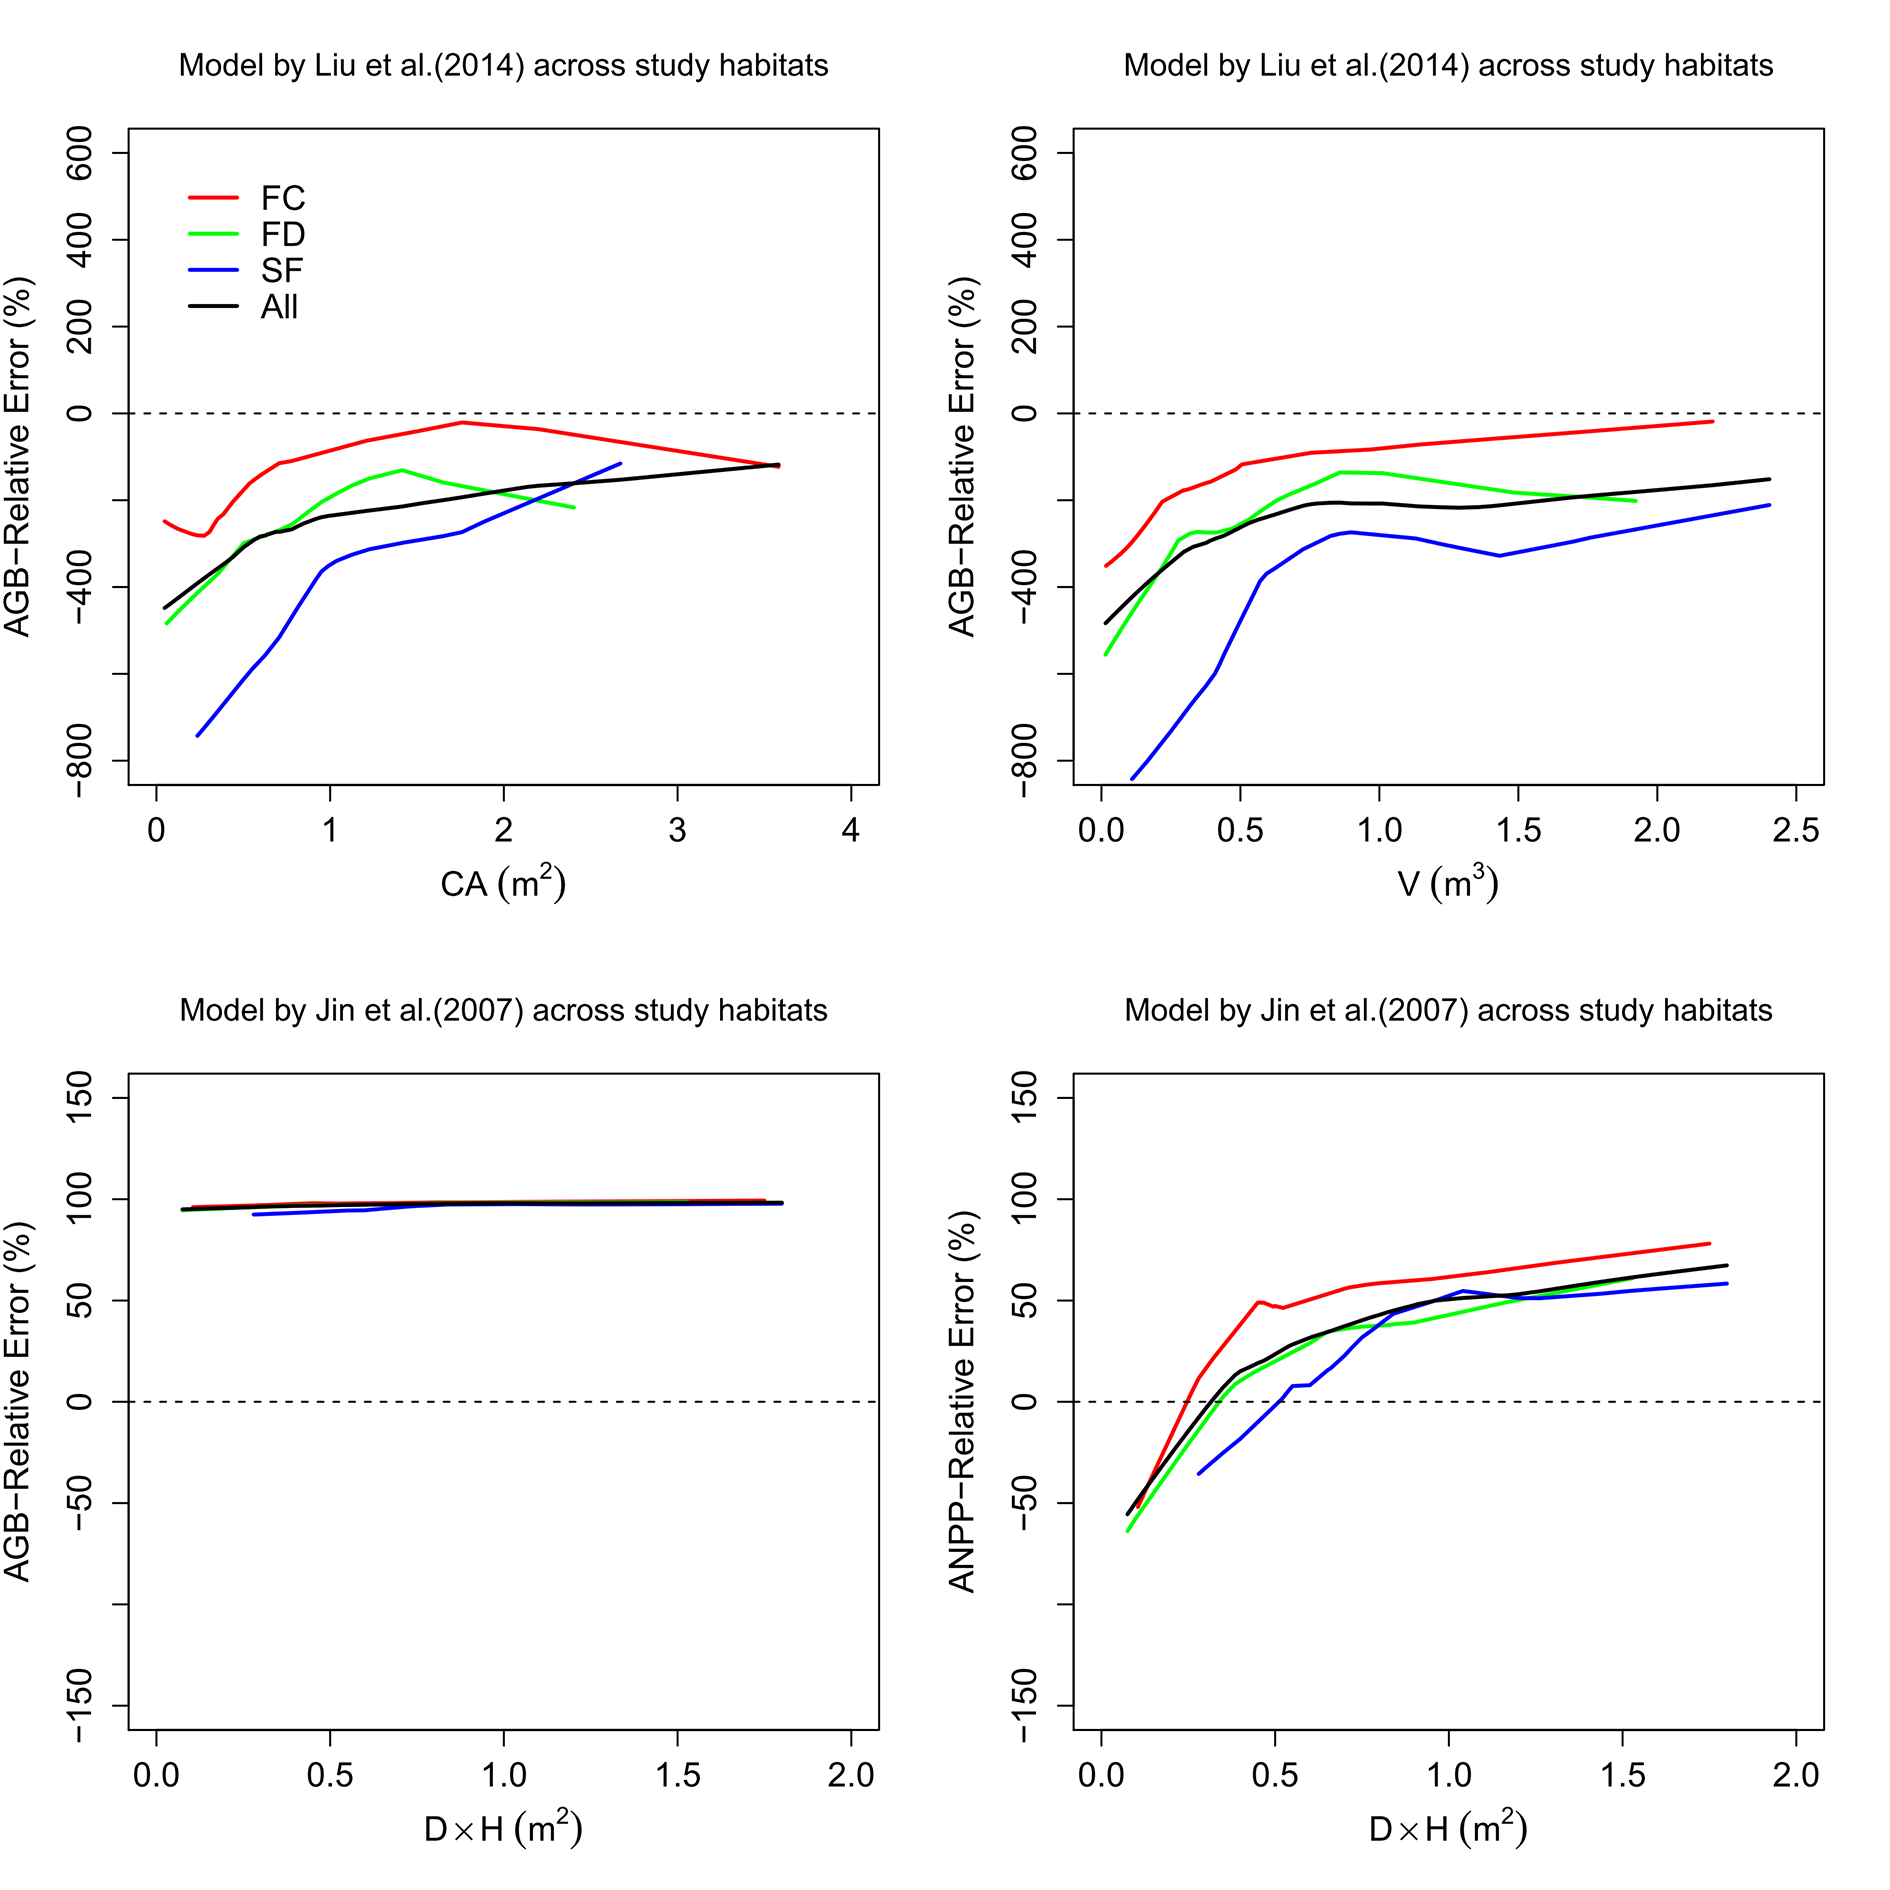


**Figure S2.** The relative error (% difference between observed and predicted biomass) with increasing plant size for evaluating previously developed models across study habitats. Solid lines are smoothed errors using a lowess (locally weighted scatterplot smoothing) method.
